# Supplementary material for: MetaGate: Interactive Analysis of High-Dimensional Cytometry Data with Meta Data Integration
Source: PubMed Central journal article supplement — bioRxiv. 2023 Nov 1:2023.10.27.564454. Preprint. [Version 1] doi: 10.1101/2023.10.27.564454 (PMC10634916; doi:10.1101/2023.10.27.564454), 2023-11-01
Supplement: NIHPP2023.10.27.564454v1-supplement-1.pdf [file NIHPP2023.10.27.564454v1-supplement-1.pdf]

552 **Supplementary Figures**

553 **Supplementary Figure 1. Gating strategy for panel 1.**

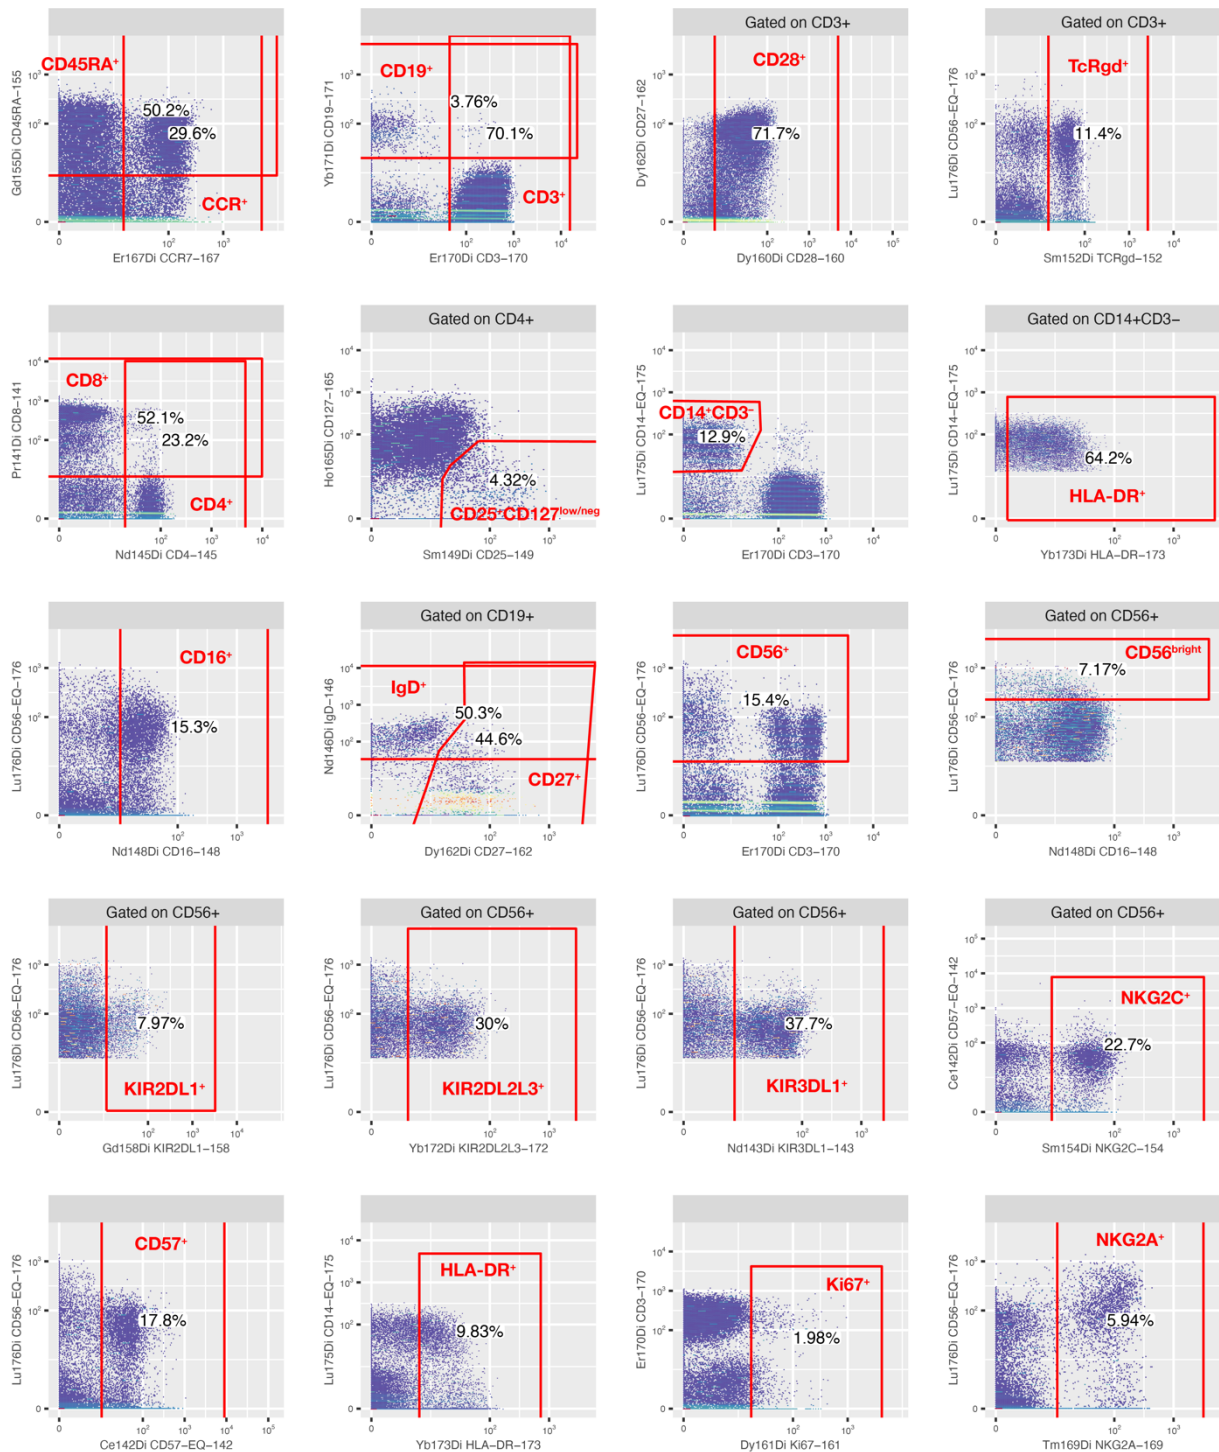

554

555 **Supplementary Figure 2. Gating strategy for panel 2.**

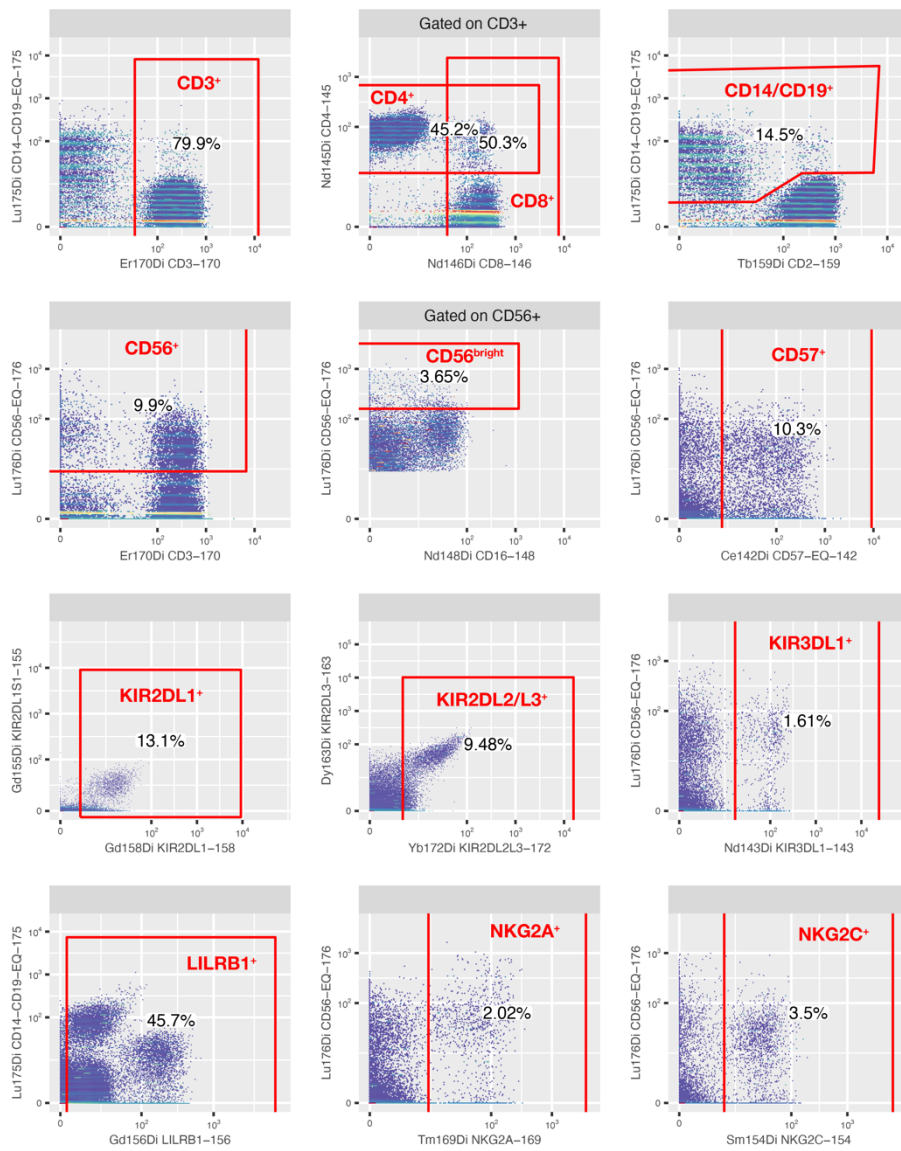

556

557 **Supplementary Tables**

558 **Supplementary Table 1. Mass cytometry panel 1.**

| Mass      | Antigen              | Clone    | Supplier    | Note         |
|-----------|----------------------|----------|-------------|--------------|
| 89Y       | CD45                 | HI30     | Fluidigm    |              |
| 102Pd     | Barcode              |          | Fluidigm    |              |
| 103Rh     | Intercalator         |          | Fluidigm    |              |
| 104Pd     | Barcode              |          | Fluidigm    |              |
| 105Pd     | Barcode              |          | Fluidigm    |              |
| 106Pd     | Barcode              |          | Fluidigm    |              |
| 108Pd     | Barcode              |          | Fluidigm    |              |
| 110Pd     | Barcode              |          | Fluidigm    |              |
| 141Pr     | CD8                  | RPA-T8   | Biologend   |              |
| 142Nd     | CD57                 | HCD57    | Fluidigm    |              |
| 143Nd     | KIR3DL1              | DX9      | Miltenyi    |              |
| 144Nd     | CD38                 | REA572   | Miltenyi    |              |
| 145Nd     | CD4                  | RPA-T4   | Fluidigm    |              |
| 146Nd     | IgD                  | IA6-2    | Fluidigm    |              |
| 147Sm     | CD71                 | AC102    | Miltenyi    | <sup>2</sup> |
| 148Nd     | CD16                 | 3G8      | Fluidigm    |              |
| 149Sm     | CD25                 | 2A3      | Fluidigm    |              |
| 150Nd     | Anti-GFP, GLUT-1-GFP | FM264G   | Biologend   | <sup>2</sup> |
| 151Eu     | CD123                | AC145    | Miltenyi    | <sup>1</sup> |
| 152Sm     | TCRgd                | 11F2     | Fluidigm    |              |
| 153Eu     | CD7                  | CD7-6B7  | Fluidigm    |              |
| 154Sm     | NKG2C                | REA205   | Miltenyi    |              |
| 155Gd     | CD45RA               | HI100    | Fluidigm    |              |
| 156Gd     | NKp46                | 9E2      | Miltenyi    |              |
| 158Gd     | KIR2DL1              | REA284   | Miltenyi    |              |
| 159Tb     | CD2                  | RPA-2.10 | eBioscience |              |
| 160Gd     | CD28                 | CD28.2   | Fluidigm    |              |
| 161Dy     | Ki67                 | B56      | Fluidigm    |              |
| 162Dy     | CD27                 | L128     | Fluidigm    |              |
| 163Dy     | CD98                 | REA387   | Miltenyi    |              |
| 164Dy     | CD161                | HP-3G10  | Fluidigm    |              |
| 165Ho     | CD127                | A019D5   | Fluidigm    |              |
| 166Er     | CD11c                | B-ly6    | BD          | <sup>1</sup> |
| 167Er     | CCR7                 | G043H7   | Fluidigm    |              |
| 168Er     | NKp30                | P30-15   | Miltenyi    |              |
| 169Tm     | NKG2A                | Z199     | Fluidigm    |              |
| 170Er     | CD3                  | UCHT1    | Fluidigm    |              |
| 171Yb     | CD19                 | Æ1       | In-house    |              |
| 172Yb     | KIR2DL2L3            | GL183    | Miltenyi    |              |
| 173Yb     | HLA-DR               | AC122    | Miltenyi    |              |
| 174Yb     | PD-1                 | EH12.2H7 | Fluidigm    |              |
| 175Lu     | CD14                 | M5E2     | Fluidigm    |              |
| 176Yb     | CD56                 | NCAM16.2 | Fluidigm    |              |
| 191/193Ir | Intercalator         |          | Fluidigm    |              |

559 <sup>1</sup> Excluded because the marker is not of relevance to this analysis.

560 <sup>2</sup> Excluded due to batch effects.

561

562 **Supplementary Table 1. Mass cytometry panel 2**

| Mass      | Antigen                                    | Clone                 | Supplier            | Note         |
|-----------|--------------------------------------------|-----------------------|---------------------|--------------|
| 89Y       | CD45                                       | HI30                  | Fluidigm            |              |
| 102Pd     | Barcode                                    |                       | Fluidigm            |              |
| 103Rh     | Intercalator                               |                       | Fluidigm            |              |
| 104Pd     | Barcode                                    |                       | Fluidigm            |              |
| 105Pd     | Barcode                                    |                       | Fluidigm            |              |
| 106Pd     | Barcode                                    |                       | Fluidigm            |              |
| 108Pd     | Barcode                                    |                       | Fluidigm            |              |
| 110Pd     | Barcode                                    |                       | Fluidigm            |              |
| 141Pr     | KIR2DS4                                    | JJC11.6               | Miltenyi            |              |
| 142Nd     | CD57                                       | HCD57                 | Fluidigm            |              |
| 143Nd     | KIR3DL1                                    | DX9                   | Miltenyi            |              |
| 144Nd     | CD38                                       | REA572                | Miltenyi            |              |
| 145Nd     | CD4                                        | RPA-T4                | Fluidigm            |              |
| 146Nd     | CD8                                        | RPA-T8                | Fluidigm            |              |
| 147Sm     | CD137                                      | 4B4-1                 | Miltenyi            | <sup>2</sup> |
| 148Nd     | CD16                                       | 3G8                   | Fluidigm            |              |
| 149Sm     | Syk                                        | 4D10.2                | Fluidigm            |              |
| 150Nd     | MIP-1 $\beta$                              | D21-1351              | Fluidigm            | <sup>1</sup> |
| 151Eu     | CD107a                                     | H4A3                  | Fluidigm            | <sup>1</sup> |
| 152Sm     | TNF $\alpha$                               | Mab11                 | Fluidigm            | <sup>1</sup> |
| 153Eu     | TIM-3                                      | F38-2E2               | Miltenyi            |              |
| 154Sm     | NKG2C                                      | REA205                | Miltenyi            |              |
| 155Gd     | KIR2DL1/S1                                 | 11PB6                 | Miltenyi            |              |
| 156Gd     | LILRB1                                     | GHI/75                | Fluidigm            |              |
| 158Gd     | KIR2DL1                                    | REA284                | Miltenyi            |              |
| 159Tb     | CD2                                        | RPA-2.10              | eBioscience         |              |
| 160Gd     | Fc $\epsilon$ R1 $\gamma$ -FITC, anti-FITC | Polyclonal, FIT-22    | Millipore, Fluidigm |              |
| 161Dy     | Ki67                                       | B56                   | Fluidigm            |              |
| 162Dy     | LFA-1 (open)                               | m24                   | Biolegend           | <sup>1</sup> |
| 163Dy     | KIR2DL3                                    | REA147                | Miltenyi            |              |
| 164Dy     | CD96                                       | NK92.39               | Biolegend           |              |
| 165Ho     | KSP37                                      | TDA3                  | Biolegend           | <sup>1</sup> |
| 166Er     | NKG2D                                      | ON72                  | Fluidigm            | <sup>2</sup> |
| 167Er     | TIGIT                                      | 4E1.2                 | Miltenyi            |              |
| 168Er     | IFN- $\gamma$                              | B27                   | Fluidigm            | <sup>1</sup> |
| 169Tm     | NKG2A                                      | Z199                  | Fluidigm            |              |
| 170Er     | CD3                                        | UCHT1                 | Fluidigm            |              |
| 171Yb     | DNAM-1                                     | DX11                  | Fluidigm            |              |
| 172Yb     | KIR2DL2L3                                  | GL183                 | Miltenyi            |              |
| 173Yb     | Granzyme B                                 | GB11                  | Fluidigm            |              |
| 174Yb     | PD-1                                       | EH12.2H7              | Fluidigm            |              |
| 175Lu     | CD14, CD19                                 | M5E2, $\text{\AA}$ E1 | Fluidigm, in-house  |              |
| 176Yb     | CD56                                       | NCAM16.2              | Fluidigm            |              |
| 191/193Ir | Intercalator                               |                       | Fluidigm            |              |

563 <sup>1</sup> Excluded because the marker is not of relevance to this analysis.

564 <sup>2</sup> Excluded due to batch effects.

565 **Supplementary Table 3. Population definitions for panel 1.**

| Name                               | Definition                                                                                                   |
|------------------------------------|--------------------------------------------------------------------------------------------------------------|
| Lymphocytes                        | Lymphocytes                                                                                                  |
| T cells                            | CD3+, NOT CD19+, NOT CD14+CD3-, NOT CD56+                                                                    |
| CD4+ T cells                       | CD4+, NOT CD8+, CD3+, NOT CD19+, NOT CD14+CD3-, NOT CD56+                                                    |
| Naive CD4+ T cells                 | CCR7+, CD45RA+, CD4+, NOT CD8+, CD3+, NOT CD19+, NOT CD14+CD3-, NOT CD56+                                    |
| Central memory CD4+ T cells        | CCR7+, NOT CD45RA+, CD4+, NOT CD8+, CD3+, NOT CD19+, NOT CD14+CD3-, NOT CD56+                                |
| Transitional memory CD4+ T cells   | CD3+ => CD28+, NOT CCR7+, NOT CD45RA+, CD4+, NOT CD8+, CD3+, NOT CD19+, NOT CD14+CD3-, NOT CD56+             |
| Effector memory CD4+ T cells       | NOT CD3+ => CD28+, NOT CCR7+, NOT CD45RA+, CD4+, NOT CD8+, CD3+, NOT CD19+, NOT CD14+CD3-, NOT CD56+         |
| EMRA CD4+ T cells                  | NOT CCR7+, CD45RA+, CD4+, NOT CD8+, CD3+, NOT CD19+, NOT CD14+CD3-, NOT CD56+                                |
| Regulatory T cells                 | CD4+ => CD25+CD127lowneg, NOT CD8+, CD3+, NOT CD19+, NOT CD14+CD3-, NOT CD56+                                |
| CD8+ T cells                       | CD8+, NOT CD4+, CD3+, NOT CD19+, NOT CD14+CD3-, NOT CD56+                                                    |
| Naive CD8+ T cells                 | CCR7+, CD45RA+, CD8+, NOT CD4+, CD3+, NOT CD19+, NOT CD14+CD3-, NOT CD56+                                    |
| Central memory CD8+ T cells        | CCR7+, NOT CD45RA+, CD8+, NOT CD4+, CD3+, NOT CD19+, NOT CD14+CD3-, NOT CD56+                                |
| Transitional memory CD8+ T cells   | CD3+ => CD28+, NOT CCR7+, NOT CD45RA+, CD8+, NOT CD4+, CD3+, NOT CD19+, NOT CD14+CD3-, NOT CD56+             |
| Effector memory CD8+ T cells       | NOT CD3+ => CD28+, NOT CCR7+, NOT CD45RA+, CD8+, NOT CD4+, CD3+, NOT CD19+, NOT CD14+CD3-, NOT CD56+         |
| EMRA CD8+ T cells                  | NOT CCR7+, CD45RA+, CD8+, NOT CD4+, CD3+, NOT CD19+, NOT CD14+CD3-, NOT CD56+                                |
| gd T cells                         | CD3+ => TCRgd+, NOT CD8+, NOT CD4+, CD3+, NOT CD19+, NOT CD14+CD3-, NOT CD56+                                |
| B cells                            | CD19+, NOT CD3+, NOT CD56+, NOT CD14+CD3-                                                                    |
| Naive B cells                      | NOT CD19+ => CD27+, CD19+, NOT CD3+, NOT CD56+, NOT CD14+CD3-                                                |
| Memory B cells                     | CD19+ => CD27+, NOT CD3+, NOT CD56+, NOT CD14+CD3-                                                           |
| IgD+ memory B cells                | CD19+ => IgD+, CD19+ => CD27+, NOT CD3+, NOT CD56+, NOT CD14+CD3-                                            |
| IgD- memory B cells                | NOT CD19+ => IgD+, CD19+ => CD27+, NOT CD3+, NOT CD56+, NOT CD14+CD3-                                        |
| NK cells                           | CD56+, NOT CD3+, NOT CD14+CD3-, NOT CD19+                                                                    |
| CD56dim NK cells                   | NOT CD56+ => CD56bright, CD56+, NOT CD3+, NOT CD14+CD3-, NOT CD19+                                           |
| NKG2A+ KIR+ CD57+ CD56dim NK cells | NKG2A+, CD56+ => KIR+, CD57+, NOT CD56+ => CD56bright, CD56+, NOT CD3+, NOT CD14+CD3-, NOT CD19+             |
| NKG2A- KIR+ CD57+ CD56dim NK cells | NOT NKG2A+, CD56+ => KIR+, CD57+, NOT CD56+ => CD56bright, CD56+, NOT CD3+, NOT CD14+CD3-, NOT CD19+         |
| NKG2A+ KIR- CD57+ CD56dim NK cells | NKG2A+, NOT CD56+ => KIR+, CD57+, NOT CD56+ => CD56bright, CD56+, NOT CD3+, NOT CD14+CD3-, NOT CD19+         |
| NKG2A- KIR- CD57+ CD56dim NK cells | NOT NKG2A+, NOT CD56+ => KIR+, CD57+, NOT CD56+ => CD56bright, CD56+, NOT CD3+, NOT CD14+CD3-, NOT CD19+     |
| NKG2A+ KIR+ CD57- CD56dim NK cells | NKG2A+, CD56+ => KIR+, NOT CD57+, NOT CD56+ => CD56bright, CD56+, NOT CD3+, NOT CD14+CD3-, NOT CD19+         |
| NKG2A- KIR+ CD57- CD56dim NK cells | NOT NKG2A+, CD56+ => KIR+, NOT CD57+, NOT CD56+ => CD56bright, CD56+, NOT CD3+, NOT CD14+CD3-, NOT CD19+     |
| NKG2A+ KIR- CD57- CD56dim NK cells | NKG2A+, NOT CD56+ => KIR+, NOT CD57+, NOT CD56+ => CD56bright, CD56+, NOT CD3+, NOT CD14+CD3-, NOT CD19+     |
| NKG2A- KIR- CD57- CD56dim NK cells | NOT NKG2A+, NOT CD56+ => KIR+, NOT CD57+, NOT CD56+ => CD56bright, CD56+, NOT CD3+, NOT CD14+CD3-, NOT CD19+ |
| NKG2C+ CD56dim NK cells            | CD56+ => NKG2C+, NOT CD56+ => CD56bright, CD56+, NOT CD3+, NOT CD14+CD3-, NOT CD19+                          |

|                           |                                                           |
|---------------------------|-----------------------------------------------------------|
| CD56bright NK cells       | CD56+ => CD56bright, NOT CD3+, NOT CD14+CD3-, NOT CD19+   |
| Monocytes                 | CD14+CD3- => HLA-DR+, NOT CD19+, NOT CD56+                |
| Classical monocytes       | NOT CD16+, CD14+CD3- => HLA-DR+, NOT CD19+, NOT CD56+     |
| Int./non-class. monocytes | CD16+, CD14+CD3- => HLA-DR+, NOT CD19+, NOT CD56+         |
| M-MDSC                    | CD14+CD3-, NOT CD14+CD3- => HLA-DR+, NOT CD19+, NOT CD56+ |
| CCR7+                     | CCR7+                                                     |
| CD3+                      | CD3+                                                      |
| CD28+ (CD3+)              | CD3+ => CD28+                                             |
| TCRgd+ (CD3+)             | CD3+ => TCRgd+                                            |
| CD4+                      | CD4+                                                      |
| CD25+ CD127low/neg (CD4+) | CD4+ => CD25+CD127lowneg                                  |
| CD8+                      | CD8+                                                      |
| CD14+ CD3-                | CD14+CD3-                                                 |
| HLA-DR+ (CD14+ CD3-)      | CD14+CD3- => HLA-DR+                                      |
| CD16+                     | CD16+                                                     |
| CD19+                     | CD19+                                                     |
| CD27+ (CD19+)             | CD19+ => CD27+                                            |
| IgD+ (CD19+)              | CD19+ => IgD+                                             |
| CD45RA+                   | CD45RA+                                                   |
| CD56+                     | CD56+                                                     |
| CD56bright                | CD56+ => CD56bright                                       |
| KIR+ (CD56+)              | CD56+ => KIR+                                             |
| KIR2DL1+ CD56+            | CD56+ => KIR2DL1+                                         |
| KIR2DL2L3+ (CD56+)        | CD56+ => KIR2DL2L3+                                       |
| KIR3DL1+ (CD56+)          | CD56+ => KIR3DL1+                                         |
| NKG2C+ (CD56+)            | CD56+ => NKG2C+                                           |
| CD57+                     | CD57+                                                     |
| HLA-DR+                   | HLA-DR+                                                   |
| Ki-67+                    | Ki-67+                                                    |
| NKG2A+                    | NKG2A+                                                    |

566

567 **Supplementary Table 4. Population definitions for panel 2.**

| Name                               | Definition                                                                                    |
|------------------------------------|-----------------------------------------------------------------------------------------------|
| T cells                            | CD3+, NOT CD14+ or CD19+, NOT CD56+                                                           |
| CD4+ T cells                       | CD3+ => CD4+, NOT CD3+ => CD8+, CD3+, NOT CD14+ or CD19+, NOT CD56+                           |
| CD8+ T cells                       | CD3+ => CD8+, NOT CD3+ => CD4+, CD3+, NOT CD14+ or CD19+, NOT CD56+                           |
| NK cells                           | CD56+, NOT CD3+, NOT CD14+ or CD19+                                                           |
| CD56dim NK cells                   | NOT CD56+ => CD56bright, CD56+, NOT CD3+, NOT CD14+ or CD19+                                  |
| NKG2A+ KIR+ CD57+ CD56dim NK cells | NKG2A+, KIR+, CD57+, NOT CD56+ => CD56bright, CD56+, NOT CD3+, NOT CD14+ or CD19+             |
| NKG2A- KIR+ CD57+ CD56dim NK cells | NOT NKG2A+, KIR+, CD57+, NOT CD56+ => CD56bright, CD56+, NOT CD3+, NOT CD14+ or CD19+         |
| NKG2A+ KIR- CD57+ CD56dim NK cells | NKG2A+, NOT KIR+, CD57+, NOT CD56+ => CD56bright, CD56+, NOT CD3+, NOT CD14+ or CD19+         |
| NKG2A- KIR- CD57+ CD56dim NK cells | NOT NKG2A+, NOT KIR+, CD57+, NOT CD56+ => CD56bright, CD56+, NOT CD3+, NOT CD14+ or CD19+     |
| NKG2A+ KIR+ CD57- CD56dim NK cells | NKG2A+, KIR+, NOT CD57+, NOT CD56+ => CD56bright, CD56+, NOT CD3+, NOT CD14+ or CD19+         |
| NKG2A- KIR+ CD57- CD56dim NK cells | NOT NKG2A+, KIR+, NOT CD57+, NOT CD56+ => CD56bright, CD56+, NOT CD3+, NOT CD14+ or CD19+     |
| NKG2A+ KIR- CD57- CD56dim NK cells | NKG2A+, NOT KIR+, NOT CD57+, NOT CD56+ => CD56bright, CD56+, NOT CD3+, NOT CD14+ or CD19+     |
| NKG2A- KIR- CD57- CD56dim NK cells | NOT NKG2A+, NOT KIR+, NOT CD57+, NOT CD56+ => CD56bright, CD56+, NOT CD3+, NOT CD14+ or CD19+ |
| NKG2C+ CD56dim NK cells            | NKG2C+, NOT CD56+ => CD56bright, CD56+, NOT CD3+, NOT CD14+ or CD19+                          |
| CD56bright NK cells                | CD56+ => CD56bright, NOT CD3+, NOT CD14+ or CD19+                                             |
| CD3+                               | CD3+                                                                                          |
| CD4+                               | CD3+ => CD4+                                                                                  |
| CD8+                               | CD3+ => CD8+                                                                                  |
| CD14+ or CD19+                     | CD14+ or CD19+                                                                                |
| CD56+                              | CD56+                                                                                         |
| CD56bright                         | CD56+ => CD56bright                                                                           |
| CD57+                              | CD57+                                                                                         |
| KIR+                               | KIR+                                                                                          |
| KIR2DL1+                           | KIR2DL1+                                                                                      |
| KIR2DL2L3+                         | KIR2DL2L3+                                                                                    |
| KIR3DL1+                           | KIR3DL1+                                                                                      |
| LILRB1+                            | LILRB1+                                                                                       |
| NKG2A+                             | NKG2A+                                                                                        |
| NKG2C+                             | NKG2C+                                                                                        |

568



569 **Supplementary Table 5. Peripheral blood immune cell abundances in healthy donors and**  
 570 **patients before therapy.**

| Readout                              | Population       | Median value |          | Subject count |          | log2 FC    | p value    |
|--------------------------------------|------------------|--------------|----------|---------------|----------|------------|------------|
|                                      |                  | Healthy      | Patients | Healthy       | Patients |            |            |
| % T cells                            | Bulk             | 54.63 %      | 30.61 %  | 17            | 28       | -0,8358211 | 2,96E-07   |
| % B cells                            | Bulk             | 8.58 %       | 4.76 %   | 17            | 28       | -0,8504041 | 0,01527325 |
| % NK cells                           | Bulk             | 11.74 %      | 13.63 %  | 17            | 28       | 0,21558804 | 0,15823181 |
| % Monocytes                          | Bulk             | 8.26 %       | 15.01 %  | 17            | 28       | 0,86163219 | 0,00098764 |
| % M-MDSC                             | Bulk             | 0.9 %        | 12.43 %  | 17            | 28       | 3,79518518 | 1,68E-07   |
| % CD4+ T cells                       | T cells          | 55.73 %      | 41.48 %  | 17            | 28       | -0,4261842 | 0,00931575 |
| % CD8+ T cells                       | T cells          | 39.18 %      | 49.8 %   | 17            | 28       | 0,34586705 | 0,01748529 |
| % gd T cells                         | T cells          | 1.77 %       | 1.31 %   | 17            | 28       | -0,4353878 | 0,68515824 |
| % Naive CD4+ T cells                 | CD4+ T cells     | 33.25 %      | 18.42 %  | 17            | 28       | -0,8518818 | 0,03309576 |
| % Central memory CD4+ T cells        | CD4+ T cells     | 32.55 %      | 22.05 %  | 17            | 28       | -0,5619033 | 0,0471276  |
| % Transitional memory CD4+ T cells   | CD4+ T cells     | 25.39 %      | 42.61 %  | 17            | 28       | 0,74687297 | 0,06931965 |
| % Effector memory CD4+ T cells       | CD4+ T cells     | 2.08 %       | 3.18 %   | 17            | 28       | 0,61297435 | 0,07700709 |
| % EMRA CD4+ T cells                  | CD4+ T cells     | 1.05 %       | 2.57 %   | 17            | 28       | 1,28319028 | 0,03959916 |
| % Regulatory T cells                 | CD4+ T cells     | 4.47 %       | 5.68 %   | 17            | 28       | 0,34762981 | 0,4649239  |
| % Naive CD8+ T cells                 | CD8+ T cells     | 18.92 %      | 4.21 %   | 17            | 28       | -2,1674409 | 0,00098764 |
| % Central memory CD8+ T cells        | CD8+ T cells     | 5.89 %       | 5.95 %   | 17            | 28       | 0,01480148 | 0,37131182 |
| % Transitional memory CD8+ T cells   | CD8+ T cells     | 20.31 %      | 22.48 %  | 17            | 28       | 0,14646699 | 0,77219008 |
| % Effector memory CD8+ T cells       | CD8+ T cells     | 7.5 %        | 11.44 %  | 17            | 28       | 0,60868413 | 0,06571372 |
| % EMRA CD8+ T cells                  | CD8+ T cells     | 30.48 %      | 45.76 %  | 17            | 28       | 0,58592034 | 0,04198928 |
| % Naive B cells                      | B cells          | 83.76 %      | 81.87 %  | 17            | 28       | -0,0328609 | 0,58595842 |
| % Memory B cells                     | B cells          | 16.24 %      | 18.13 %  | 17            | 28       | 0,15853257 | 0,58595842 |
| % IgD+ memory B cells                | Memory B cells   | 21.84 %      | 13.52 %  | 17            | 23       | -0,6915886 | 0,04803052 |
| % IgD- memory B cells                | Memory B cells   | 78.16 %      | 86.48 %  | 17            | 23       | 0,14588778 | 0,04803052 |
| % CD56bright NK cells                | NK cells         | 6.24 %       | 2.81 %   | 17            | 28       | -1,1521417 | 2,91E-05   |
| % CD56dim NK cells                   | NK cells         | 93.76 %      | 97.19 %  | 17            | 28       | 0,05189189 | 2,91E-05   |
| % NKG2A+ KIR+ CD57+ CD56dim NK cells | CD56dim NK cells | 3.49 %       | 4.82 %   | 17            | 28       | 0,46470857 | 0,71955557 |
| % NKG2A- KIR+ CD57+ CD56dim NK cells | CD56dim NK cells | 12.96 %      | 16.15 %  | 17            | 28       | 0,31661505 | 0,75451763 |
| % NKG2A+ KIR- CD57+ CD56dim NK cells | CD56dim NK cells | 10.44 %      | 9.38 %   | 17            | 28       | -0,1539872 | 0,91701338 |
| % NKG2A- KIR- CD57+ CD56dim NK cells | CD56dim NK cells | 8.62 %       | 8.53 %   | 17            | 28       | -0,0149587 | 0,73697003 |
| % NKG2A+ KIR+ CD57- CD56dim NK cells | CD56dim NK cells | 4.52 %       | 4.37 %   | 17            | 28       | -0,0461083 | 0,88036026 |
| % NKG2A- KIR+ CD57- CD56dim NK cells | CD56dim NK cells | 10.74 %      | 11.97 %  | 17            | 28       | 0,15730461 | 0,50865543 |
| % NKG2A+ KIR- CD57- CD56dim NK cells | CD56dim NK cells | 19.81 %      | 19.32 %  | 17            | 28       | -0,0358563 | 0,93540976 |
| % NKG2A- KIR- CD57- CD56dim NK cells | CD56dim NK cells | 22.08 %      | 16.9 %   | 17            | 28       | -0,385279  | 0,09440922 |
| % NKG2C+ CD56dim NK cells            | CD56dim NK cells | 3.56 %       | 5 %      | 17            | 28       | 0,48672765 | 0,35894261 |
| % Classical monocytes                | Monocytes        | 87.76 %      | 85.08 %  | 17            | 28       | -0,0448749 | 0,38393621 |
| % Int./non-class. monocytes          | Monocytes        | 12.24 %      | 14.92 %  | 17            | 28       | 0,28647881 | 0,38393621 |

571
